# Supplementary material
Source: Research Square preprint supplement (doi:10.21203/rs.3.rs-9391174/v1)
Supplement: Supplementary file 2 [file e188644c1edae496a2f19a2c.docx]

**Table 2** Enzymatic synthesis of 2′-deoxypyrimidine nucleoside analogues using *Bh*NDT-M2[a] and *Bh*NDT[b]

| Entry | Target product | Acceptor baser | *Bh*NDT-M2: Yield[c] (%) | *Bh*NDT: Yield[c] (%) |
| --- | --- | --- | --- | --- |
| **1a** |  |  | 43.1 | 38.8 |
| **2a** |  |  | 46.9 | 34.1 |
| **3a** |  |  | 35.2 | 12.9 |
| **4a** |  |  | 56.9 | 24 |
| **5a** |  |  | 87.2 | 36.1 |
| **6a** |  |  | 39.1 | 7 |
| **7a** |  |  | 34.7 | 5.1 |

[a] Reaction conditions: 10 mM PBS, pH 8.0, 45°C, receptor and donor concentrations were 20 mM and 40 mM (1:2 ratio), the enzyme concentration was 1.4 mg/mL, 5 mL system, reaction time was 1 h. [b] Reaction conditions: 10 mM PBS, pH 7.0, 45°C, receptor and donor concentrations were 20 mM and 40 mM (1:2 ratio), the enzyme concentration was 1.4 mg/mL, 5 mL system, reaction time was 1 h. [c] Yield=[n(mol)generated product FdUrd/n(mol)initial substrate Thd] ×100%.
